# Supplementary material for: Metagenomics research on PAH biodegradation in the lower reaches of the Shiwuli River in Chaohu, China
Source: Royal Society of Chemistry journal article supplement (doi:10.1039/d5em00025d), 2025-01-01
Supplement: d5em00025d2.pdf [file d5em00025d2.pdf]

## Supplementary Text

### Equipment details, detection and quantification and quality control procedures

#### PAHs Extraction and Analysis

All freeze-dried samples were ground and passed through a 150 micron mesh sieve. We then extracted the PAHs using an accelerated solvent extraction solution (ASE-350, Dionex Company, Sunnyvale, CA, USA). Briefly, 5 g samples were mixed with 1g diatomite and PAH standards of 20 $\mu$ L 1mg/L, and were then poured into a 34mL extraction vessel. The extraction solvent was a 20mL mixture of n-hexane and dichloromethane with a 1:1 volume ratio. The extraction pressure was 1500 psi and the temperature was 100°C. The heating and static extraction times were 8min and 10min, respectively. The flushing volume was set at 60%, and the nitrogen purging time was 60s. Three cycles were carried out. The extract was concentrated to 15mL on a RE-52A rotary evaporator (Yarong Technology Co., Ltd., Fujian, China), purified using sulfuric acid and desulfurized using copper powder, concentrated to 2mL in the rotary evaporator, and then purified with a composite silica gel purification column. The purification column was filled with 2g of deactivated silica gel, 1g acidic silica gel, 1g deactivated silica gel, 1g alkaline silica gel, 2g activated silica gel and 2g anhydrous sodium sulfate from bottom to top. PAHs were eluted with a mixture of 100mL n-hexane and dichloromethane (1:1, V/V). The eluent was collected and concentrated to 2mL in the rotary evaporator. Using a nitrogen sweeper, the eluent was slowly blown to nearly dry, with a constant volume of 300mL.

The PAHs were analyzed by gas chromatography mass spectrometry (GC-MS, Agilent 7890A/5975C, Agilent Technologies Inc., CA, USA) with a DB-5MS capillary column (0.25 mm  $\times$  0.25  $\mu$ m  $\times$  30 m J&K Scientific, San Jose, CA, USA). The carrier gas was high purity He (99.999%) with a 1.0 mL/min flow rate. A sample (1 $\mu$ L) was injected using an automatic sampling system. The temperatures of the inlet, ion source, and transmission lines were 25°C, 240°C, and 280°C, respectively. The oven temperature was initially set at 80°C for 2 min, then gradually increased (15°C/min) to 215°C for 1 min. The oven temperature was further increased (6°C/min)

to 280°C for 1 min, and finally reached 300°C at 10°C/min for 5 min. The GS-MS detector was operated in electron impact mode at 70 eV with an ionic source temperature of 240°C. A selected ion mode was used to identify the PAHs. The concentrations of the PAHs are given as the dry mass of the sample.

## References and Reagents

Major reagents included the mixed standard solution of 16 priority PAHs: Naphthalene (Nap), Acenaphthylene (Acy), Acenaphthene (Acp), Fluorene (FLR), Phenanthrene (PHE), Anthracene (Ant), Fluoranthene (FLT), Pyrene (PYR), Chrysene (CHR), Benzo [a] anthracene (BaA), benzo[k]flfluoranthene (BkF), Benzo[a]pyrene (BaP), Benzo[b]flfluoranthene (BbF), Dibenz[a,h]anthracene (DhA), Benzo[ghi]perylene (BgP), and Indeno[1,2,3,cd]pyrene (IcP). The mixed standard solution was purchased from AccuStandard Company, New Haven, CT, USA. Chromatography-grade n-hexane and dichloromethane as an extract and eluent of PAHs were purchased from TEDIA Company, Fairfield, OH, USA. The anhydrous Na<sub>2</sub>SO<sub>4</sub> was purified and activated prior to analysis in a muffle furnace at 400°C for 4h. The internal standard compound, Philppine-d<sub>10</sub>, was purchased from the J & K Company (San Jose, CA, USA). The internal standard compound was a pure substance, and the contents of the measured components were determined by comparison. Copper powder and silica gel were purchased from the National Pharmaceutical Group (Beijing, China). All other chemicals were analytical grade.

## Quality Control

After each triplicate sample group (n = 3) analysis, a blank sample was analyzed to monitor interference during sample processing. The analyte concentration of blank samples was less than 5% of the minimum concentration of all samples, representing the background signal due to sample extraction and measurement procedures. The limit of quantitation (LOQ) was defined as ten times that of the signal to noise ratio (10 S/N). In this study, the quantitative limit of PAHs in the samples was obtained by

adding the standard to 5 g sediment (dry weight). The LOQ of the PAH compounds ranged from 0.015 ng/g to 0.095 ng/g. The recoveries of the 16 PAH species ranged from 73.5% to 116.8% and the recovery of the internal standard compounds ranged from 86.3% to 108.4%. The calibration curves were plotted by peak area versus the concentrations of PAH compounds with  $R^2$  values ranging from 0.990 to 0.998 for the 16 examined PAHs.



Table S1 Physicochemical parameters of sediment/soil of samples

| Sample   | Nitrate  | Ammonia  | Total    | Water   | pH   | Conductivity | TOC   | Acy (  |      |      | Total      | FLR (ng/g | PHE    | Ant (ng/ | FLT (ng/ | PYR    |        | CHR    |         | BaA (n   | BkF (ng   | BaP (ng/ | BbF (ng/g | DhA (n | BgP (ng | IcP (ng/g |
|----------|----------|----------|----------|---------|------|--------------|-------|--------|------|------|------------|-----------|--------|----------|----------|--------|--------|--------|---------|----------|-----------|----------|-----------|--------|---------|-----------|
|          | nitrogen | nitrogen | nitrogen |         |      |              |       | Nap (n | ng/g | ng/g |            |           |        |          |          | (ng/g  | (ng/g  | BaA (n | BkF (ng | BaP (ng/ | BbF (ng/g |          |           |        |         |           |
| name     | (mg/kg)  | (mg/kg)  | (mg/kg)  | content |      | (μs/cm)      |       | g/g)   | )    | )    | PAH (ng/g) | )         | (ng/g) | g)       | g)       | )      | )      | g/g)   | /g)     | g)       | )         | g/g)     | /g)       | )      |         |           |
| Dit-bh-2 | 3.96     | 42.02    | 1721.97  | 0.27    | 6.47 | 308.00       | 11.04 | 3.96   | 3.10 | 3.57 | 896.04     | 16.21     | 91.03  | 38.60    | 69.03    | 97.74  | 107.96 | 51.28  | 142.19  | 81.48    | 37.34     | 16.18    | 68.96     | 67.40  |         |           |
| Dit-bh-4 | 1.72     | 22.29    | 1876.01  | 0.28    | 6.92 | 256.00       | 13.12 | 58.15  | 4.38 | 5.92 | 1248.41    | 25.48     | 147.99 | 91.51    | 119.98   | 123.31 | 144.61 | 64.84  | 168.83  | 67.74    | 42.58     | 19.89    | 78.89     | 84.32  |         |           |
| Dit-es-1 | 4.79     | 198.64   | 1316.95  | 0.40    | 6.50 | 1833.00      | 5.47  | 32.07  | 1.19 | 3.01 | 633.07     | 11.37     | 86.10  | 55.74    | 54.75    | 46.94  | 51.84  | 39.54  | 85.02   | 42.33    | 28.04     | 15.83    | 36.17     | 43.14  |         |           |
| Agr-bh-2 | 1.11     | 2.17     | 772.53   | 0.21    | 7.05 | 279.00       | 5.40  | 5.68   | 0.67 | 0.43 | 106.21     | 3.67      | 23.74  | 2.28     | 12.69    | 6.82   | 11.52  | 4.27   | 3.70    | 10.06    | 4.06      | 0.55     | 8.11      | 7.96   |         |           |
| Agr-bh-4 | 2.71     | 25.10    | 772.99   | 0.27    | 6.93 | 160.80       | 10.30 | 16.69  | 0.68 | 0.60 | 75.39      | 2.82      | 13.64  | 8.13     | 6.37     | 3.58   | 5.30   | 2.00   | 2.06    | 3.12     | 1.54      | 0.55     | 3.95      | 4.36   |         |           |
| Agr-es-1 | 0.37     | 8.89     | 690.86   | 0.22    | 7.02 | 134.00       | 10.30 | 16.31  | 0.50 | 0.43 | 55.45      | 4.68      | 17.79  | 3.01     | 3.78     | 3.12   | 2.64   | 0.64   | 0.43    | 0.30     | 0.43      | 0.55     | 0.30      | 0.55   |         |           |
| Riv-bh-2 | 0.92     | 2.70     | 1373.16  | 0.19    | 6.80 | 259.00       | 25.70 | 74.14  | 0.87 | 0.93 | 496.16     | 11.78     | 62.16  | 95.66    | 37.02    | 21.51  | 37.51  | 15.30  | 16.45   | 22.19    | 15.12     | 8.59     | 41.08     | 35.86  |         |           |
| Riv-bh-4 | 0.76     | 4.19     | 946.35   | 0.23    | 7.15 | 132.90       | 20.10 | 2.80   | 0.52 | 0.45 | 166.63     | 2.84      | 30.09  | 17.29    | 15.46    | 9.25   | 17.53  | 6.45   | 6.47    | 9.26     | 6.74      | 3.85     | 20.14     | 17.50  |         |           |
| Riv-es-1 | 0.49     | 5.30     | 943.81   | 0.22    | 6.99 | 70.10        | 0.90  | 12.79  | 0.95 | 0.91 | 156.45     | 2.84      | 16.60  | 29.61    | 17.52    | 10.51  | 12.59  | 9.72   | 6.60    | 9.46     | 6.56      | 0.55     | 9.37      | 9.87   |         |           |

**Table S2 KEGG Orthology contributed by the main PAHs degrading bacteria at different sampling points**

| Sampling points<br>Genus |          |          |          |          |          |          |          |          |          |
|--------------------------|----------|----------|----------|----------|----------|----------|----------|----------|----------|
|                          | Dit-bh-2 | Dit-es-1 | Riv-bh-4 | Riv-es-1 | Dit-bh-4 | Agr-bh-4 | Agr-bh-2 | Riv-bh-2 | Agr-es-1 |
| <i>Actinoplanes</i>      | K00480   |          | K00448   |          |          |          | K00448   |          |          |
|                          | K04102   | K00480   | K00480   | K00448   | K00480   | K00480   | K00480   | K00480   | K00480   |
|                          |          |          |          |          |          |          | K04102   |          |          |
|                          | K00448   |          |          |          | K00448   |          |          | K00448   | K00448   |
| <i>Bradyrhizobium</i>    | K00449   |          | K00449   | K00448   | K00449   | K00480   |          | K00449   | K00449   |
|                          | K00480   | K00480   | K00480   | K00449   | K00480   | K04100   | K00448   | K00480   | K00480   |
|                          | K04100   | K04100   | K04100   | K00480   | K04100   | K04101   | K00480   | K04100   | K04100   |
|                          | K04101   |          | K04101   | K04101   | K04101   | K04102   | K04101   | K04101   | K04101   |
|                          | K04102   |          | K04102   |          | K04102   |          |          | K04102   | K04102   |
|                          |          |          |          |          | K00449   | K00449   | K00449   | K00449   | K00449   |
| <i>Mycobacterium</i>     |          |          | K00449   |          | K00480   | K00480   | K00480   | K04102   | K00480   |
|                          | K00449   |          | K04102   | K00449   | K11946   | K04102   | K04102   | K11946   | K04102   |
|                          | K00480   |          | K11948   |          | K11948   | K11946   | K11946   | K11948   | K11946   |
|                          |          |          | K18252   |          | K18252   | K11948   | K11948   | K18252   | K11948   |
| <i>Nocardioides</i>      | K00448   |          |          | K00448   |          |          |          |          |          |
|                          | K00449   |          | K00449   |
|                          | K04101   |          |          | K04101   | K04101   | K04101   |          | K04101   | K04101   |
| <i>Pseudolabrys</i>      | K00448   |          | K00448   |          | K00448   | K00448   | K00449   | K00448   | K00448   |
|                          | K00449   |          | K00449   | K00448   | K00449   | K00449   | K00480   | K00449   | K00449   |
|                          | K00480   |          | K00480   | K00449   | K00480   | K00480   | K04102   | K00480   | K00480   |

| Sampling points                         |          |          |          |          |          |          |          |          |          |
|-----------------------------------------|----------|----------|----------|----------|----------|----------|----------|----------|----------|
| Genus                                   | Dit-bh-2 | Dit-es-1 | Riv-bh-4 | Riv-es-1 | Dit-bh-4 | Agr-bh-4 | Agr-bh-2 | Riv-bh-2 | Agr-es-1 |
| <i>Rhizobium</i>                        | K04100   |          | K04100   |          | K04100   | K04102   |          | K04102   | K04102   |
|                                         | K04101   |          | K04102   |          | K04101   | K18069   |          | K18069   | K18069   |
|                                         | K04102   |          | K18069   |          | K04102   |          |          |          |          |
|                                         | K18069   |          |          |          | K18069   |          |          |          |          |
|                                         |          |          |          | K00448   |          |          |          |          |          |
|                                         |          |          | K00448   |          |          |          |          | K00449   |          |
|                                         | K00480   |          | K00480   | K00449   | K00480   | K00480   | K00480   | K00480   | K00480   |
|                                         | K04102   |          | K04102   | K00480   | K04102   | K04102   | K04102   | K04102   | K04102   |
|                                         |          |          | K04102   | K04102   |          |          |          |          |          |
|                                         |          |          |          |          |          |          |          |          |          |
| <i>Rhodoplanes</i>                      | K00480   | K00480   | K00480   |          | K00480   |          | K00480   | K00480   | K00480   |
|                                         | K04100   | K04101   | K04100   | K00480   | K04100   | K04101   | K04100   | K04100   | K04100   |
|                                         | K04101   | K04102   | K04101   | K04102   | K04101   | K04102   | K04101   | K04101   | K04101   |
|                                         | K04102   |          | K04102   |          | K04102   |          | K04102   | K04102   | K04102   |
| <i>Rubrobacter</i>                      |          |          | K00448   |          |          |          | K00448   | K00448   | K00448   |
|                                         | K00448   |          | K00449   | K00449   | K00448   | K00448   | K00449   | K00449   | K00449   |
|                                         | K00449   |          | K00480   |          | K00449   | K00449   | K00480   | K00480   | K00480   |
|                                         |          |          |          |          |          | K00448   | K00448   |          | K00448   |
| <i>Streptomyces</i>                     | K00449   |          |          |          | K00449   | K00449   | K00449   | K00480   | K00449   |
|                                         | K00480   |          | K00480   | K00480   | K00480   | K00480   | K00480   | K04101   | K00480   |
|                                         | K04101   |          | K04101   | K04101   | K04101   | K04101   | K04101   | K04102   | K04101   |
|                                         |          |          |          |          | K04102   | K04102   | K04102   |          | K04102   |
| <i>unclassified_c__Betaproteobacter</i> | K00480   |          | K00480   |          | K00480   | K00480   | K00480   | K00480   | K04102   |
| <i>ia</i>                               | K04100   |          | K04100   |          | K04100   | K04101   | K04101   | K04100   | K18067   |

| Sampling points |          |          |          |          |          |          |          |          |          |
|-----------------|----------|----------|----------|----------|----------|----------|----------|----------|----------|
| Genus           | Dit-bh-2 | Dit-es-1 | Riv-bh-4 | Riv-es-1 | Dit-bh-4 | Agr-bh-4 | Agr-bh-2 | Riv-bh-2 | Agr-es-1 |
|                 | K04101   |          | K04101   |          | K04101   | K04102   |          | K04101   |          |
|                 | K04102   |          | K04102   |          | K04102   | K18067   |          | K04102   |          |
|                 |          |          | K14581   |          |          |          |          | K18074   |          |
